# Supplementary material for: Nitrogen-rich covalent organic polymers and potassium iodide for efficient chemical fixation of CO2 into epoxides under mild conditions
Source: Royal Society of Chemistry journal article supplement (doi:10.1039/d1se00251a), 2021-01-01
Supplement: d1se00251a1.pdf [file d1se00251a1.pdf]

## Supporting Information

# Nitrogen-rich covalent organic polymer and potassium iodide for efficient chemical fixation of CO<sub>2</sub> into epoxides under mild conditions

Yongjing Hao,<sup>a</sup> Xiuli Yan,<sup>a</sup> Xiuli Yan,<sup>a</sup> Zheng Zhu,<sup>a</sup> Tao Chang,<sup>\*,a,b</sup> Xiaocai Meng,<sup>a</sup> Xiyang Fu,<sup>a</sup> Balaji Panchal,<sup>a</sup> Lianwei Kang<sup>a</sup> and Shenjun Qin<sup>\*,a</sup>

<sup>a</sup> Key Laboratory of Utilization of CO<sub>2</sub> of Handan City, *College of Material Science and Engineering, Hebei University of Engineering, Handan 056038, Hebei, China*

<sup>b</sup> Key Laboratory of Heterocyclic Compounds of Hebei Province, *Handan College, Handan 056005, Hebei, China*

## 1. SEM images of NUPs

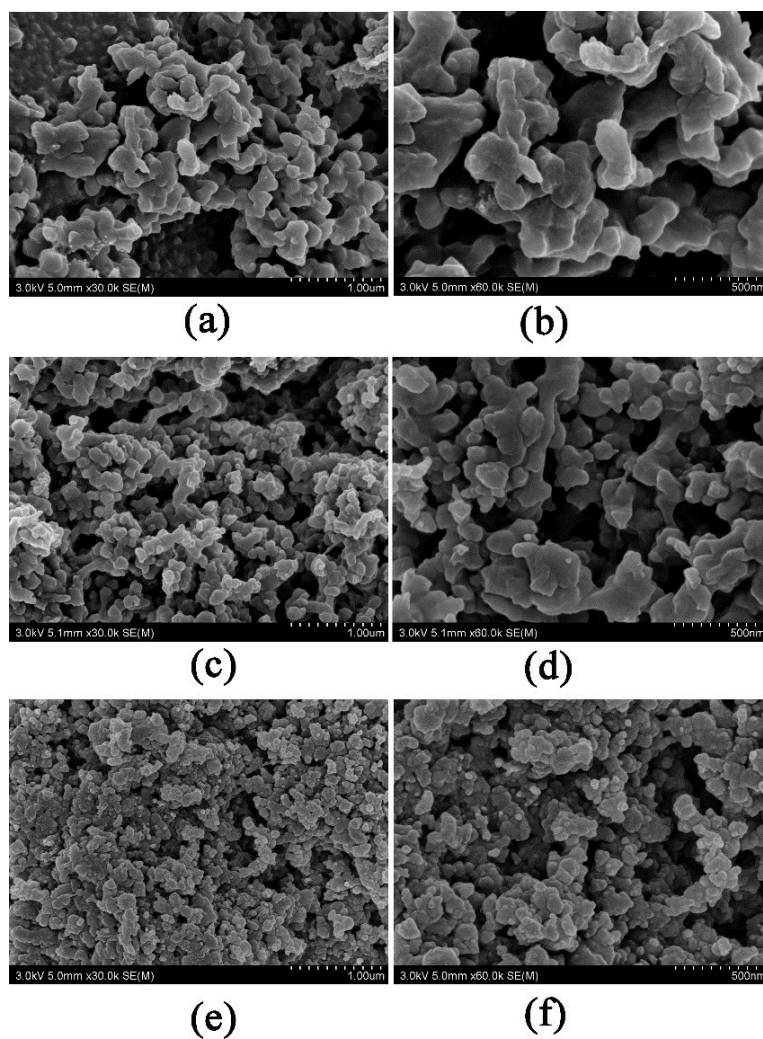

Fig. S1 SEM images of NUP-1(a and b), NUP-2(c and d) and NUP-3(e and f)

## 2. XRD pattern of NUPs

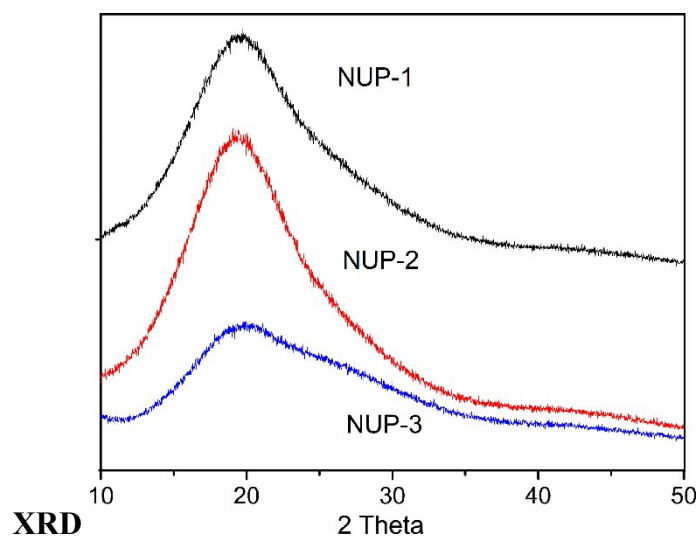

Fig. S2 The XRD pattern of NUPs

## 3. The solubility of KI studied by UV-vis

UV-vis spectra were performed on a TU-1810 spectrophotometer (1-cm quartz cell). Epoxides (0.78ml, 10mmol) and KI (16.8mg, 0.1mmol) were added into a Schlenk tube, then magnetic stirring for 24 hours, after that, the supernatant was diluted 200 times and studied by UV-vis, according to the standard working line, the concentration of KI in ECH is  $6.04 \times 10^{-3}$  mol / L ( $(3.02 \times 10^{-5} \times 200)$  mol / L).

Thus, the solubility of KI in ECH is:  $S = 6.04 \times 10^{-3} / (16.8 / 168 \times 0.78) = 4.7\%$ .

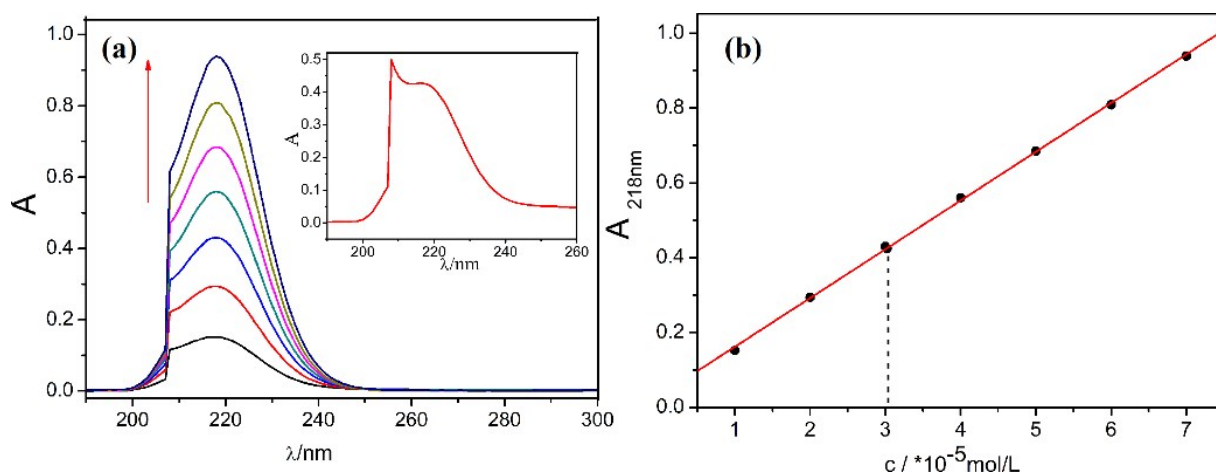

Fig. S3 Solubility of KI in ECH studied by UV-vis. (a) Absorption spectra of KI ( $1 \times 10^{-5}$  M  $\sim 7 \times 10^{-5}$  M in ethanol), Inset: the absorption spectra of the sample diluted 200 times. (b) The variation of the absorption spectra of KI at 218nm.

#### 4. FT-IR spectra

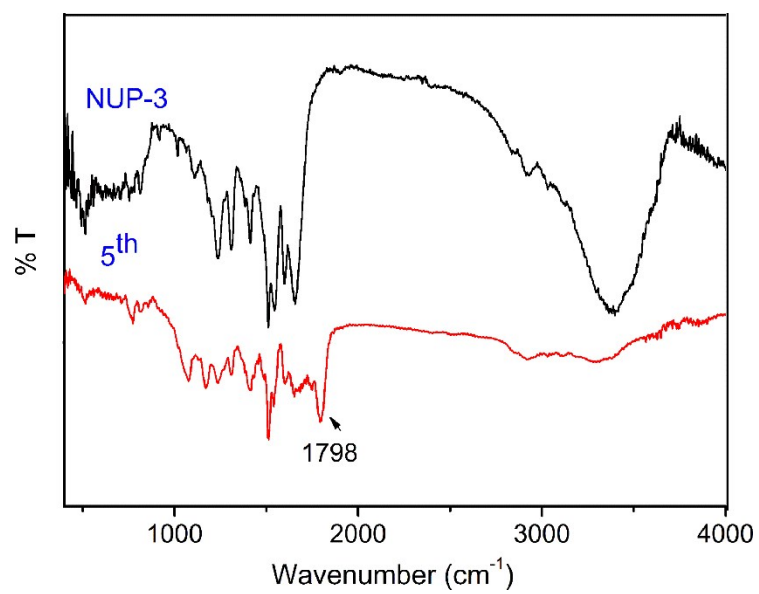

Fig. S4 The FT-IR spectra of NUP-3 and recycled solid of 5<sup>th</sup>.
